# Supplementary material
Source: PubMed Central journal article supplement (PMC3668017)

# Supplemental Figure 1

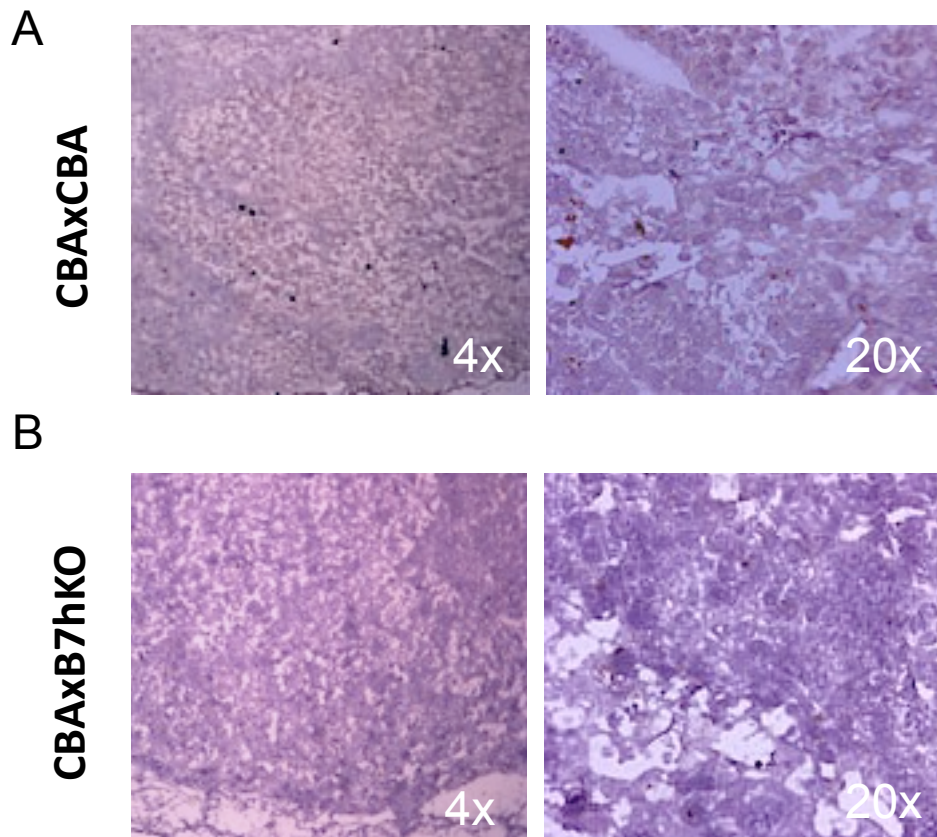

Supplement: mmc1.pdf [file mmc1.pdf]

# Supplemental Figure 3.

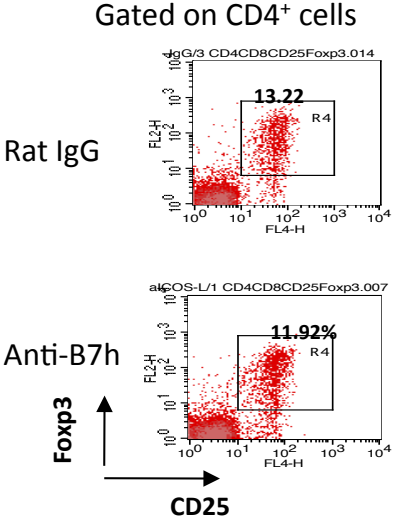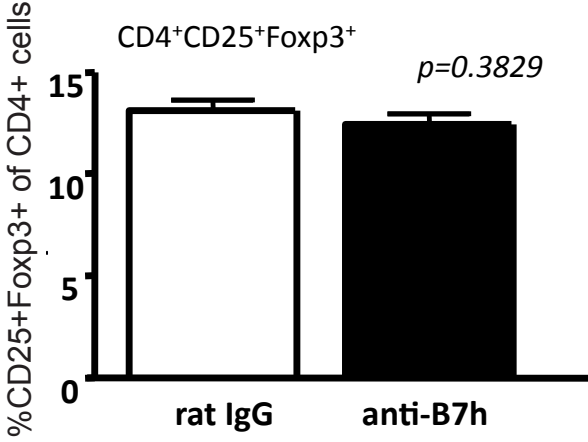

Supplement: mmc3.pdf [file mmc3.pdf]
